# Supplementary material for: The Effectiveness of Early Enteral Nutrition on Clinical Outcomes in Critically Ill Sepsis Patients: A Systematic Review
Source: MDPI journal article supplement (doi:10.3390/nu15143201), 2023-07-19
Supplement: s1 [file s1]

**Table S1.** Search queries.

| Database | Embase & MEDLINE Complete (2023.03.10 07:29 GMT)                                                                                                                                                                                                                                                                                                                                                                                                                                                                                                                                                                         |           |
|----------|--------------------------------------------------------------------------------------------------------------------------------------------------------------------------------------------------------------------------------------------------------------------------------------------------------------------------------------------------------------------------------------------------------------------------------------------------------------------------------------------------------------------------------------------------------------------------------------------------------------------------|-----------|
| #1       | 'septic shock'/mj OR 'systemic inflammatory response syndrome'/mj OR 'multiple organ failure'/mj OR 'bacteremia'/mj OR 'endotoxic shock'/mj OR systemic-inflammatory-response* OR multi-system-inflammatory* OR systemic-inflammation-syndrome* OR hyperinflammatory-syndrom* OR sepsis-associated-hypotension* OR septicaemic-shock* OR septicemic-shock* OR endotoxin-shock* OR toxic-shock* OR multiple-organ-fail* OR multiple-organ-dysfunct* OR multiorgan-fail* OR multiorgan-dysfunct* OR multisystem-organ-fail* OR multisystem-dysfunct* OR bacteremi* OR fungemi* OR septic* OR sepsi* OR urosepsi* OR shock* | 804,707   |
| #2       | 'enteric feeding'/mj OR enteric-feed* OR enteral-nutrit* OR intragastric* OR nasogastric* OR nasojejunal* OR intestinal-feed* OR tube-feed* OR orogastric* OR orojejunal*                                                                                                                                                                                                                                                                                                                                                                                                                                                | 113,827   |
| #3       | 'intensive care unit'/mj OR 'extracorporeal oxygenation'/mj OR 'vasoconstrictor agent'/mj OR 'cardiotonic agent'/mj OR 'renal replacement therapy'/mj OR 'ventilator'/mj OR intensive-care* OR critical-care* OR ICU OR CCM OR stroke-unit* OR coronary-care-unit* OR burn-unit* OR close-attention-unit* OR intensivist* OR critical-ill* OR critically-ill*                                                                                                                                                                                                                                                            | 1,088,176 |
| #4       | #1 AND #2 AND #3                                                                                                                                                                                                                                                                                                                                                                                                                                                                                                                                                                                                         | 3,737     |
| #5       | #4 AND [2004-2023]/py                                                                                                                                                                                                                                                                                                                                                                                                                                                                                                                                                                                                    | 3,157     |
| Database | CINAHL Complete (2023.03.10 08:30 GMT)                                                                                                                                                                                                                                                                                                                                                                                                                                                                                                                                                                                   |           |
| #1       | (MM "Shock, Septic") OR (MM "Systemic Inflammatory Response Syndrome") OR (MM "Multiple Organ Dysfunction Syndrome") OR (MM "Bacteremia") OR systemic-inflammatory-response* OR multi-system-inflammatory* OR systemic-inflammation-syndrome* OR hyperinflammatory-syndrom* OR sepsis-associated-hypotension* OR septicaemic-shock* OR septicemic-shock* OR endotoxin-shock* OR toxic-shock* OR multiple-organ-fail* OR multiple-organ-dysfunct* OR multiorgan-fail* OR multiorgan-dysfunct* OR multisystem-organ-fail* OR multisystem-dysfunct* OR bacteremi* OR fungemi* OR septic* OR sepsi* OR urosepsi* OR shock*   | 184,638   |
| #2       | (MM "Enteral Nutrition") OR (MM "Enteral Feeding Pumps") OR (MM "Feeding Tubes") OR enteric-feed* OR enteral-nutrit* OR intragastric* OR nasogastric* OR nasojejunal* OR intestinal-feed* OR tube-feed* OR orogastric* OR orojejunal*                                                                                                                                                                                                                                                                                                                                                                                    | 33,488    |
| #3       | (MM "Intensive Care Units") OR (MM "Critical Care") OR (MM "Critical Care Nursing") OR (MM "Extracorporeal Membrane Oxygenation") OR (MM "Vasoconstrictor Agents") OR (MM "Cardiotonic Agents") OR (MM "Renal Replacement Therapy") OR (MM "Continuous Renal Replacement Therapy") OR (MM "Ventilators, Mechanical") OR intensive-care* OR critical-care* OR ICU OR CCM OR stroke-unit* OR coronary-care-unit* OR burn-unit* OR close-attention-unit* OR intensivist* OR critical-ill* OR critically-ill*                                                                                                                | 429,965   |
| #4       | #1 AND #2 AND #3                                                                                                                                                                                                                                                                                                                                                                                                                                                                                                                                                                                                         | 3,247     |
| #5       | #4 AND 20040101-20231231                                                                                                                                                                                                                                                                                                                                                                                                                                                                                                                                                                                                 | 2,814     |
| Database | ClinicalTrials.gov (2023.03.10 07:42 GMT)                                                                                                                                                                                                                                                                                                                                                                                                                                                                                                                                                                                |           |
| #1       | septic OR sepsis OR urosepsis OR uroseptic OR shock OR shocks OR bacteremia OR bacteremic OR fungemia OR fungemic OR "SIRS" OR                                                                                                                                                                                                                                                                                                                                                                                                                                                                                           | 4,551     |

|                 |                                                                                                                                                                                                                                                                                                       |       |
|-----------------|-------------------------------------------------------------------------------------------------------------------------------------------------------------------------------------------------------------------------------------------------------------------------------------------------------|-------|
|                 | "MODS"                                                                                                                                                                                                                                                                                                |       |
| #2              | (enteric AND feed) OR (enteral AND feed) OR (enteral AND nutrit) OR intragastric OR nasogastric OR nasojejunal OR tube-feed OR orogastric OR orojejunal                                                                                                                                               | 2,212 |
| #3              | #1 AND #2                                                                                                                                                                                                                                                                                             | 96    |
| #4              | #3 AND 20040101-20231231                                                                                                                                                                                                                                                                              | 95    |
| <b>Database</b> | <b>International Clinical Trials Registry Platform (ICTRP) (2023.03.10 07:53 GMT)</b>                                                                                                                                                                                                                 |       |
|                 | (septic OR sepsis OR urosepsis OR uroseptic OR shock OR shocks OR bacteremia OR bacteremic OR fungemia OR fungemic OR "SIRS" OR "MODS") AND ((enteric AND feed) OR (enteral AND feed) OR (enteral AND nutrit) OR intragastric OR nasogastric OR nasojejunal OR tube-feed OR orogastric OR orojejunal) | 24    |
| <b>Database</b> | <b>Cochrane Central Register of Controlled Trials (CENTRAL) (2023.03.10 07:56 GMT)</b>                                                                                                                                                                                                                |       |
|                 | (septic OR sepsis OR urosepsis OR uroseptic OR shock OR shocks OR bacteremia OR bacteremic OR fungemia OR fungemic OR "SIRS" OR "MODS") AND ((enteric AND feed) OR (enteral AND feed) OR (enteral AND nutrit) OR intragastric OR nasogastric OR nasojejunal OR tube-feed OR orogastric OR orojejunal) | 840   |

CINAHL, Cumulative Index to Nursing and Allied Health Literature; GMT, Greenwich Mean Time.

**Table S2.** Detailed information on day-related outcomes from each RCT and cohort studies (three studies each).

|                  | Timing of early EN | Days related outcome variables                                         | EEN        | DEN        | Significance |
|------------------|--------------------|------------------------------------------------------------------------|------------|------------|--------------|
| <b>RCT</b>       |                    |                                                                        |            |            |              |
| Patel 2020       | 24 to 48 h         | ICU free days (30 days)                                                | 25 (14-27) | 12 (0-22)  | p = 0.014    |
|                  |                    | VFD (30 days)                                                          | 27 (24-28) | 14 (0-26)  | p = 0.0090   |
| Sun 2019         | 24 to 48 h         | ICU days                                                               | 8 (4)      | 11 (5)     | p = 0.035    |
|                  |                    | Mechanical ventilation days                                            | 5 (3)      | 7 (4)      | p = 0.0060   |
| Reignier 2018    | 24 to 96 h         | ICU LOS                                                                | 9 (5-16)   | 10 (5-17)  | NS           |
|                  |                    | Acute-care hospital LOS                                                | 17 (8-32)  | 18 (9-33)  | NS           |
|                  |                    | Days without mechanical ventilation                                    | 11 (0-23)  | 12(0-23)   | NS           |
|                  |                    | Days without vasopressor support (28 days)                             | 20 (0-25)  | 21 (0-26)  | NS           |
|                  |                    | Days without dialysis (28 days)                                        | 27 (0-28)  | 27 (0-23)  | NS           |
| <b>Cohort</b>    |                    |                                                                        |            |            |              |
| Ortiz-Reyes 2022 | 0 to 48 h          | ICU LOS in survivors                                                   | 14 (11)    | 20 (14)    | p = 0.00010  |
|                  |                    | Hospital LOS amongst survivors                                         | 23 (13)    | 28 (15)    | p = 0.020    |
|                  |                    | ICU free days (28 days)                                                | 9 (9)      | 6 (8)      | p = 0.00020  |
|                  |                    | VFD (28 days)                                                          | 12 (10)    | 10 (9)     | NS           |
|                  |                    | Length of MV in survivors                                              | 10 (11)    | 14 (15)    | p = 0.00020  |
|                  |                    | Days alive and vasopressor free days (28 days)                         | 17 (10)    | 16 (9)     | p = 0.050    |
|                  |                    | Days alive and free of vasopressor (12 days)                           | 7 (3)      | 6 (3)      | p = 0.0070   |
|                  |                    | Time from ICU admission until discontinuation of vasopressor (28 days) | 6 (5)      | 8 (6)      | p = 0.00080  |
|                  |                    | PODs-free days (28 days)                                               | 11 (10)    | 9 (9)      | p = 0.030    |
| Jiang 2020       | 0 to 24 h          | ICU LOS                                                                | 11 (8-22)  | 10 (6-16)  | p = 0.022    |
|                  |                    | Hospital LOS                                                           | 23 (14-53) | 18 (10-39) | p = 0.023    |
| Koga 2018        | 0 to 48 h          | Not reported                                                           | N/A        | N/A        | N/A          |

DEN, Delayed Enteral Nutrition; EEN, Early Enteral Nutrition; ICU, Intensive Care Unit; LOS, Length of Stay; N/A, Not Applicable; NS, Not Significant; PN, Parenteral Nutrition; PODs, Persistent Organ Dysfunctions; RCT, Randomized Controlled Trials; VFD, Ventilator Free Day(s).

**Table S3.** Summary of quality assessment of RCTs (three Studies)

|               | <b>Domain 1. Risk of bias arising from the randomization process</b> | <b>Domain 2-1: Risk of bias due to deviations from the intended interventions</b> | <b>Domain 2-2: Risk of bias due to deviations from the intended interventions</b> | <b>Domain 3: Missing outcome data</b> | <b>Domain 4: Risk of bias in measurement of the outcome</b> | <b>Domain 5: Risk of bias in selection of the reported result</b> |
|---------------|----------------------------------------------------------------------|-----------------------------------------------------------------------------------|-----------------------------------------------------------------------------------|---------------------------------------|-------------------------------------------------------------|-------------------------------------------------------------------|
| Patel 2020    | Low                                                                  | Unclear                                                                           | High                                                                              | Low                                   | Low                                                         | Low                                                               |
| Sun 2019      | Low                                                                  | Unclear                                                                           | High                                                                              | Low                                   | Low                                                         | Unclear                                                           |
| Reignier 2018 | Low                                                                  | Low                                                                               | High                                                                              | Low                                   | Low                                                         | Low                                                               |

RCTs, randomized controlled trials.

**Table S4.** Quality assessment of cohort studies (three studies).

|                  | Selection          |                                   |                           |                                      | Comparability                                  | Outcome            |                                                 |                                  | Total |
|------------------|--------------------|-----------------------------------|---------------------------|--------------------------------------|------------------------------------------------|--------------------|-------------------------------------------------|----------------------------------|-------|
|                  | Representativeness | Selection of the unexposed cohort | Ascertainment of exposure | Demonstration of outcome of interest | Comparability of cohorts based on study design | Outcome assessment | Was follow-up long enough for outcomes to occur | Adequacy of follow-up of cohorts |       |
| Ortiz-Reyes 2022 | 1                  | 1                                 | 1                         | 1                                    | 2                                              | 1                  | 1                                               | 1                                | 9     |
| Jiang 2020       | 0                  | 0                                 | 0                         | 1                                    | 1                                              | 1                  | 1                                               | 1                                | 5     |
| Koga 2018        | 0                  | 0                                 | 0                         | 1                                    | 1                                              | 1                  | 1                                               | 1                                | 5     |

**Table S5.** Quality assessment of case-control studies (five studies).

|            | Selection                |                    |                       |                        | Comparability                                             | Exposure                  |                   | Total |
|------------|--------------------------|--------------------|-----------------------|------------------------|-----------------------------------------------------------|---------------------------|-------------------|-------|
|            | Case definition adequacy | Representativeness | Selection of controls | Definition of controls | Comparability of cases and controls based on study design | Ascertainment of exposure | Non-response rate |       |
| Liu 2020   | 1                        | 0                  | 1                     | 1                      | 1                                                         | 0                         | 0                 | 4     |
| Haac 2018  | 0                        | 0                  | 1                     | 1                      | 1                                                         | 0                         | 0                 | 3     |
| Sun 2017   | 1                        | 0                  | 1                     | 1                      | 1                                                         | 0                         | 0                 | 4     |
| Patel 2016 | 1                        | 0                  | 1                     | 1                      | 1                                                         | 0                         | 0                 | 4     |
| Yuan 2011  | 1                        | 0                  | 1                     | 1                      | 1                                                         | 0                         | 0                 | 4     |

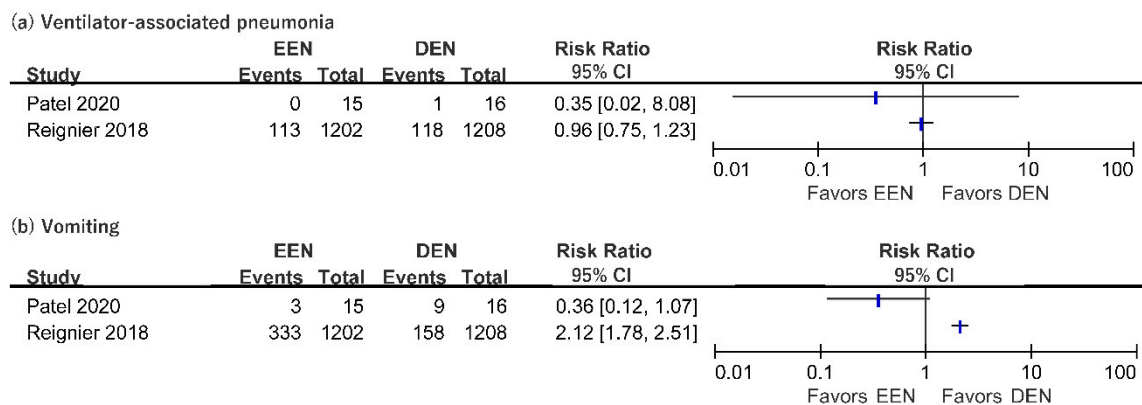

**Figure S1.** Forest plot of (a) ventilator-associated pneumonia and (b) vomiting events from two RCTs. CI, Confidence Interval; DEN, Delayed Enteral Nutrition; EEN, Early Enteral Nutrition; VAP, ventilator-associated pneumonia.
